# Supplementary material
Source: PubMed Central journal article supplement (PMC3890853)
Supplement: 1311970111_sapp.pdf [file 1311970111_sapp.pdf]

## **Supplementary Information Appendix for:**

# Rewiring yeast sugar transporter preference through modifying a conserved protein motif

**Eric M. Young, Alice Tong, Hang Bui, Caitlin Spofford, and Hal S. Alper \***

\* To whom correspondence should be addressed: *e-mail: halper@che.utexas.edu*

### Table of Contents:

1. Supplementary Methods Section
2. Supplementary Figure Legends
3. Supplementary Figures
  - a. Figures S1 to S7
4. Supplementary Tables
  - a. Tables S1 to S6

## **Supplementary Methods Section**

*Growth rate measurements* – All exponential growth rates were measured and calculated according to the method previously described using a Bioscreen C (Growth Curves USA, Piscataway, New Jersey) and a MATLAB script. The Bioscreen C measures online optical density for easy and accurate measurement of the growth curves of up to 200 strains at one time. Error was calculated based on biological triplicate in all cases. In all cases, the Bioscreen C was set to maintain a temperature of 30°C, employ high continuous shaking, and to measure optical density every 10 minutes. A single carbon source per well was used in all experiments save one. Growth on xylose in the presence of increasing concentrations of glucose was measured for *C. intermedia* gxs1 Phe<sup>38</sup> Ile<sup>39</sup> Met<sup>40</sup>.

It is important to note that the environment of the Bioscreen C does not support cultures reaching high optical density and observed values are below OD<sub>600</sub> of 2. This does not reflect the optical densities reached in flasks, which typically approach OD<sub>600</sub> of 10.

*Transporter Cloning* - Each of these transporters was functionally analyzed for conferred growth rate on xylose and glucose in *S. c. EX.12*. Genomic DNA and PCR were performed as previously described (36). Using this approach, open reading frames from *Scheffersomyces stipitis*, *Debaryomyces hansenii*, *Yarrowia lipolytica*, and *Saccharomyces cerevisiae* were cloned using primers listed in **Table S4**. Mutant transporters and saturation library construction is described below and Primers are listed in **Tables S5** (saturation) and **S6** (point).

*Saturation mutagenesis and point mutation* – The Strategene Multi mutagenesis kit was used to generate saturation mutagenesis libraries at positions 38, 39, and 40 in *C.i.* GXS1. Each codon was replaced with the degenerate NNK sequence recommended for use when creating saturation mutagenesis libraries. It is important to note that the wild type codon was represented in the NNK library for both Val<sup>38</sup> and Leu<sup>39</sup> thus alternative

primers that did not contain the wild type sequence were designed. This subsequently necessitated the design of specific point mutation primers to access certain residues and the use of the Stratagene Quikchange kit. Some single point mutation primers were ordered to complete the saturation libraries. The Stratagene Quikchange mutagenesis kit was used to generate all rational single, double, and triple mutants. Primers are listed in **Tables S5** (saturation) and **S6** (point).

## **Supplementary Figure Legends**

**Figure S1** - *Maximum exponential growth rates for all cloned native and heterologous transporters.* Bar chart of growth rate ( $\mu$ ) calculated from growth curves of *S. cerevisiae* EX.12 measured on a Bioscreen C. Carbon source profiling on five different sugars allows better functional classification than measuring only glucose and xylose. Error is standard deviation of biological triplicates. **A.** Transporters cloned in the initial study measured for the first time in *S. cerevisiae* EX.12. **B.** Novel transporters identified and characterized in this study. Abbreviations: *Empty* – empty vector control strain. *A.t.* – *Arabidopsis thaliana*. *C.i.* – *Candida intermedia*. *C.n.* – *Cryptococcus neoformans*. *D.h.* – *Debaryomyces hansenii*. *S.c.* – *Saccharomyces cerevisiae*. *S.s.* – *Scheffersomyces stipitis*. *Y.l.* – *Yarrowia lipolytica*.

**Figure S2** - *High cell density cofermentation in S. cerevisiae EX.12.* Cells were inoculated at OD 20 in a mixture of 10 g/L glucose and 10 g/L xylose. Optical density, glucose, xylose, and ethanol concentration was measured over the length of the fermentation. Note that the triple mutant does not consume either xylose or glucose, nor is an appreciable amount of ethanol produced in this multiple knockout strain. **A.** Optical density over time. **B.** Glucose concentration in the media over time. **C.** Xylose concentration in the media over time. **D.** Ethanol concentration in the media over time.

**Figure S3** – *High cell density cofermentation in S. cerevisiae YSX3.* Cells were inoculated at OD 20 in a mixture of 10 g/L glucose and 10 g/L xylose. Optical density, glucose, xylose, and ethanol concentration was measured over the length of the fermentation. Note that the triple mutant does not appreciably alter the fermentation dynamics in a strain that is expressing the full suite of transporters. **A.** Optical density over time.

**B.** Glucose concentration in the media over time. **C.** Xylose concentration in the media over time. **D.** Ethanol concentration in the media over time.

**Figure S4 - Growth curves of transporters of interest.** Optical density measurements from the Bioscreen C were plotted over time. Each line represents the growth curve for *S. cerevisiae* EX.12 expressing a transporter on a particular carbon source. **A.** *D.h.* 2D01474. **B.** *S.s.* RGT2. **C.** *D.h.* 2E01166. **D.** *D.h.* 2B05060. **E.** *S.c.* STL1. **F.** *S.s.* AUT1.

**Figure S5 - Phylogenetic tree and growth rate.** Phylogram constructed in TreeView of a ClustalW multiple sequence alignment with the full amino acid sequences of all transporters. To the right of the phylogram is plotted the exponential growth rate of *S. cerevisiae* EX.12 conferred by transporter expression. A blue line and a green line are placed across the chart to mark the upper limit of no growth for glucose and xylose, respectively. Note the most robust glucose growth phenotypes are clustered in the HXT family and related transporters. Some of the more desirable growth phenotypes for xylose growth are clustered in the transporters related to *C.i.* GXS1 and *S.s.* XUT3.

**Figure S6 - Relatedness based on G-G/F-XXXG motif and growth rate data.** Phylogram constructed in TreeView of a ClustalW multiple sequence alignment of the G-G/F-XXG motif of each transporter. To the right of the phylogram is plotted the exponential growth rate of *S. cerevisiae* EX.12 conferred by transporter expression. A blue line and a green line are placed across the chart to mark the upper limit of no growth for glucose and xylose, respectively. Arranging the transporters in this fashion remarkably clusters conferred phenotype better than basing the alignment on the whole amino acid sequence. This is further evidence of the influence the G-G/F-XXG motif has over monosaccharide uptake.

**Figure S7** – *Carbon source profile comparison*. **A.** *C.i. GXS1* and mutants. **B.** *S.s. RGT2* and mutants. **C.** *S.c. HXT7* and mutants. Note that these values are maximum exponential growth rates, and therefore may produce different comparisons than the late-stage linear exponential portions of the growth curves.

# Supplementary Figures

## Figure S1

### A

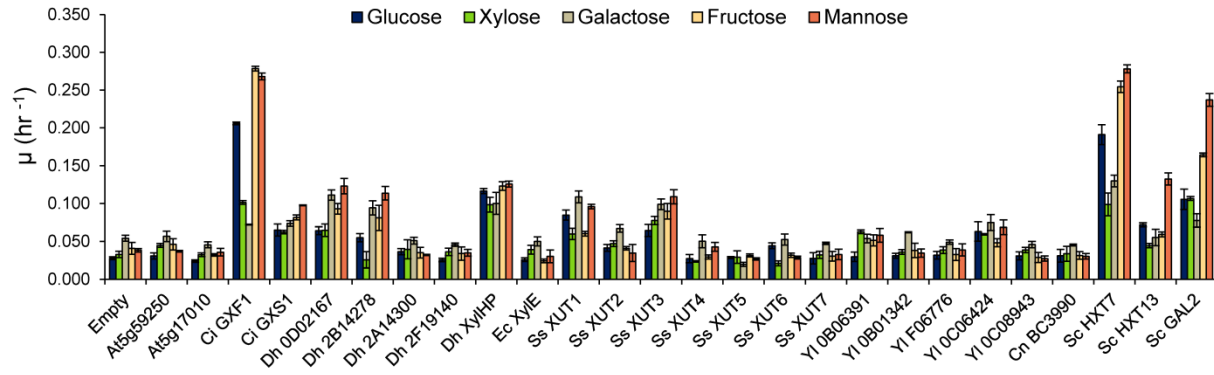

### B

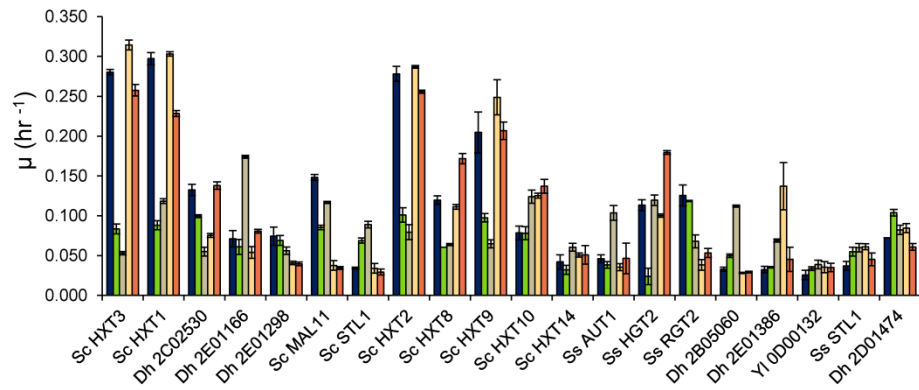

Figure S2

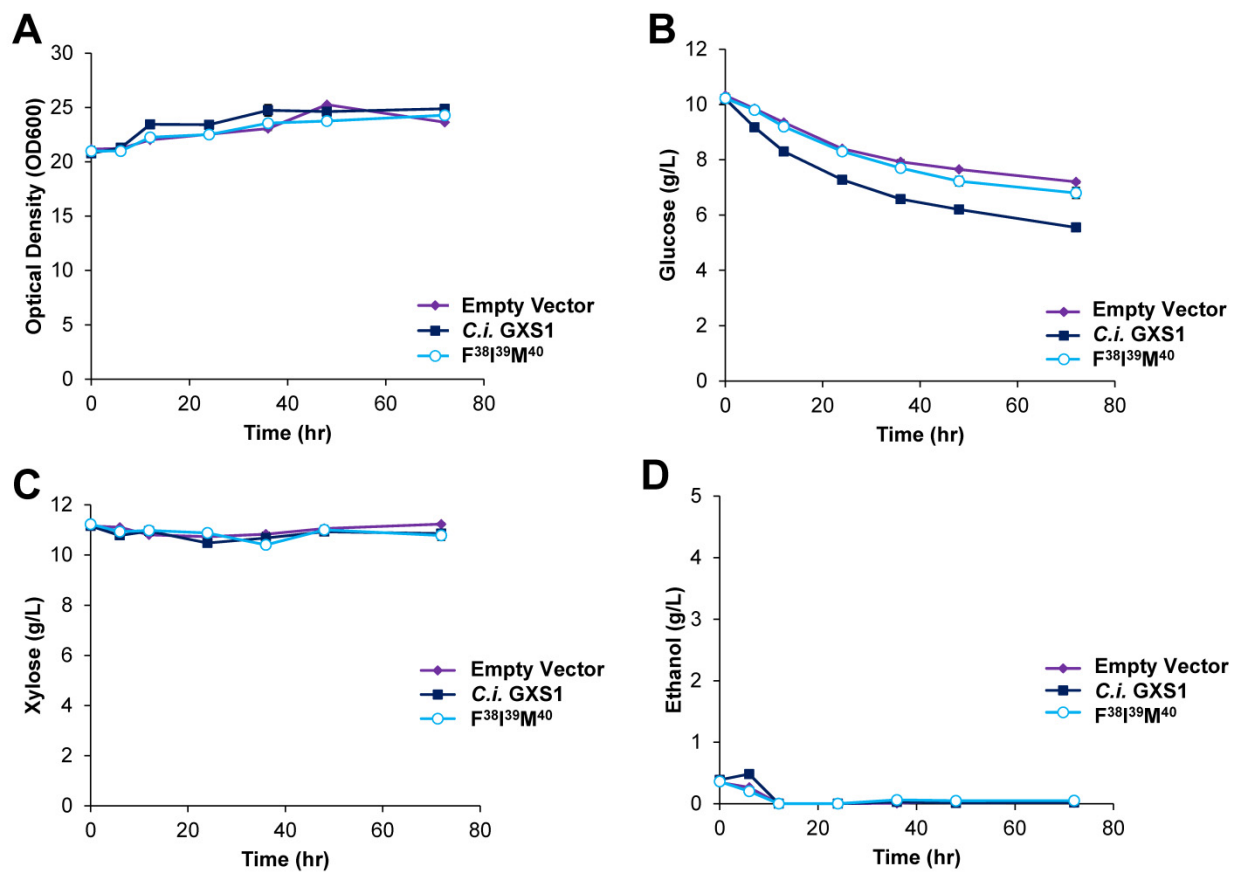



Figure S3

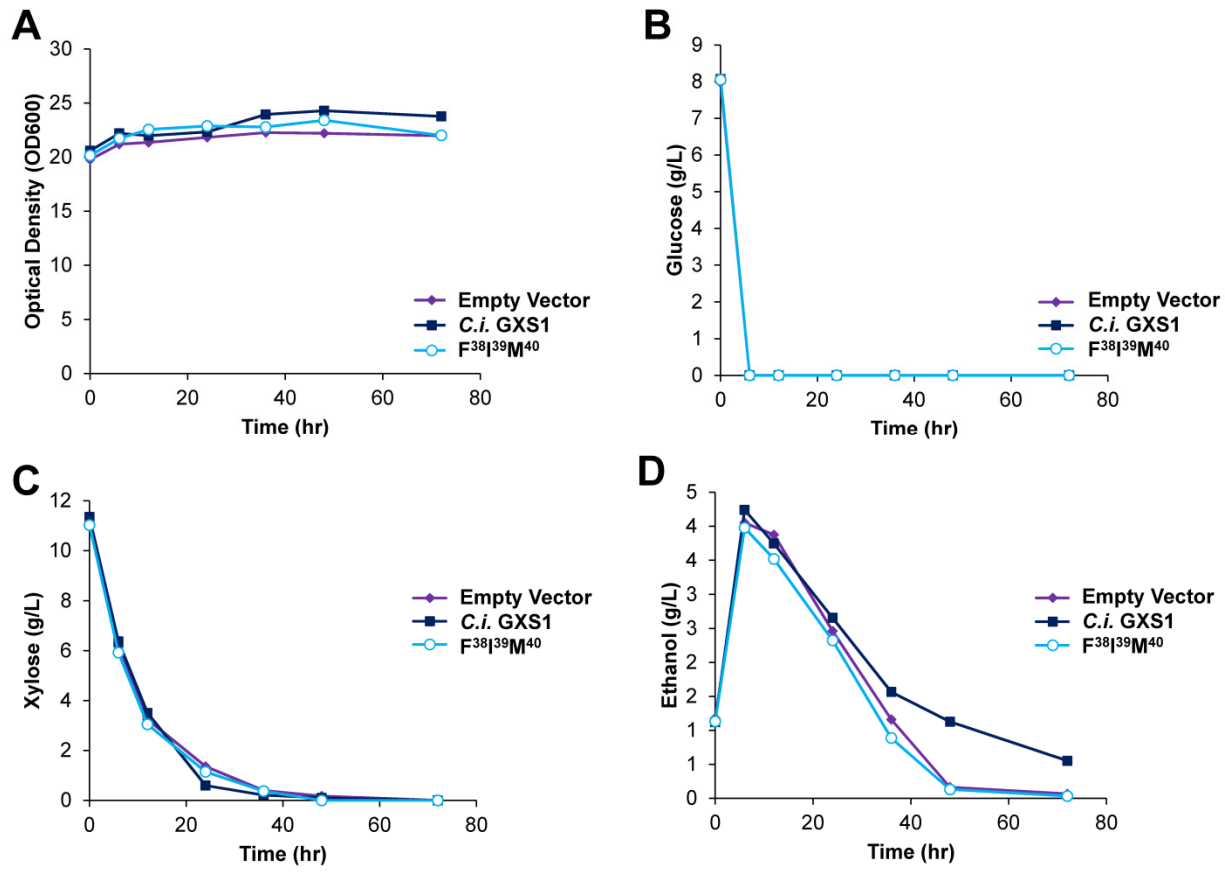

Figure S4

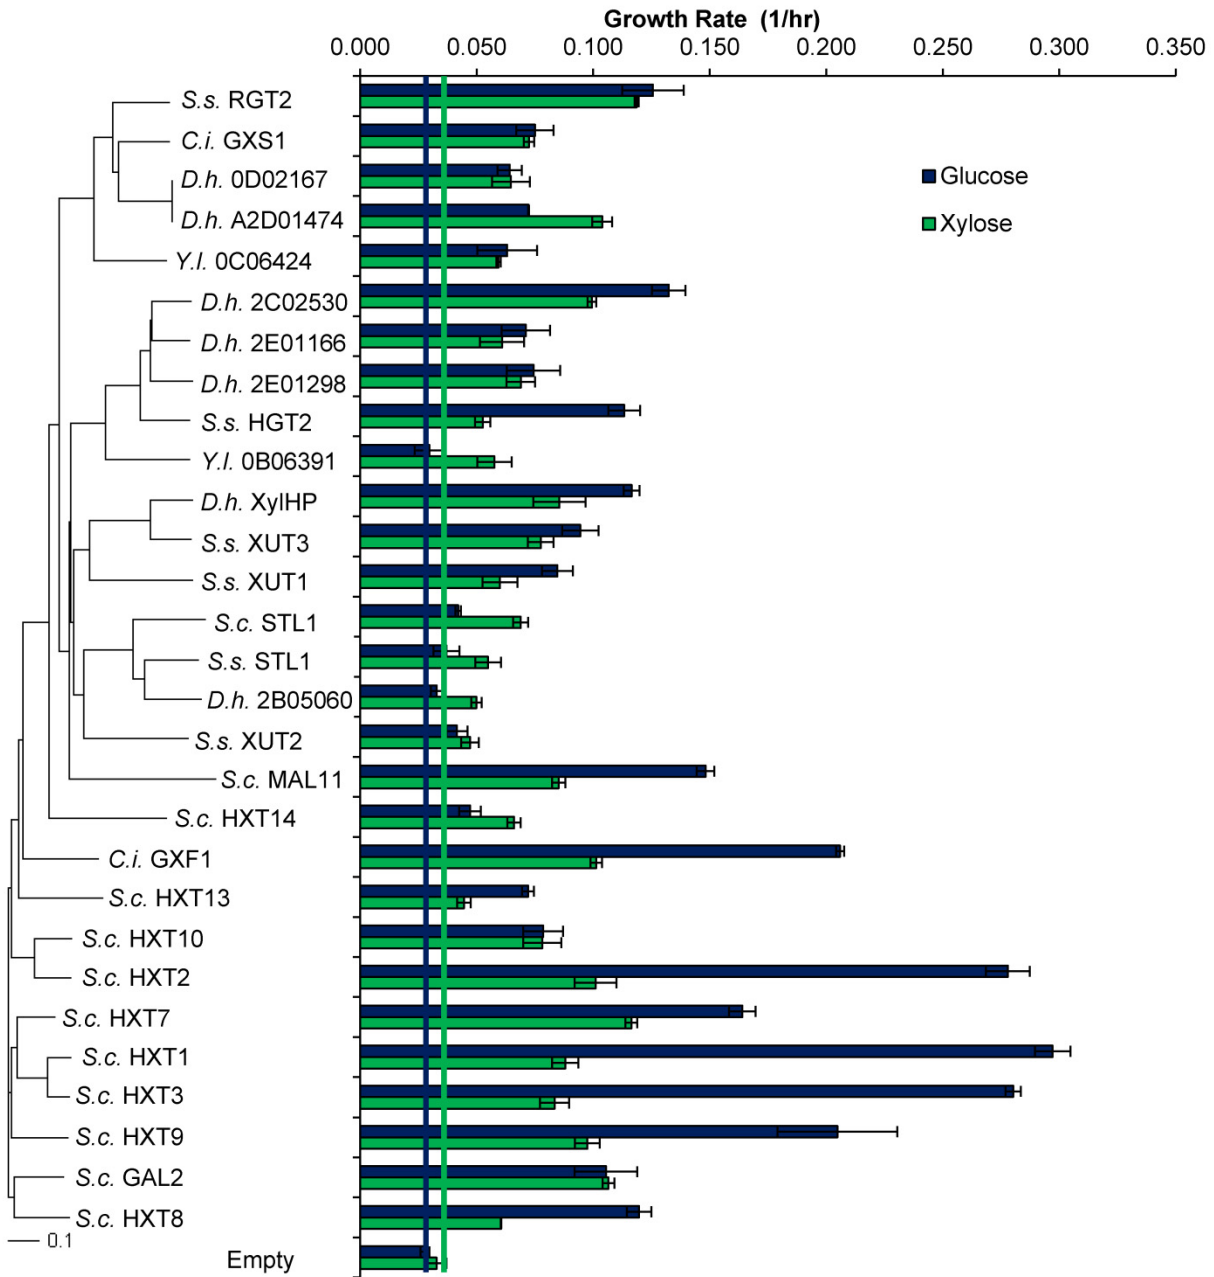

Figure S5

G-G/F-XXXG  
Motif  
Distance Tree

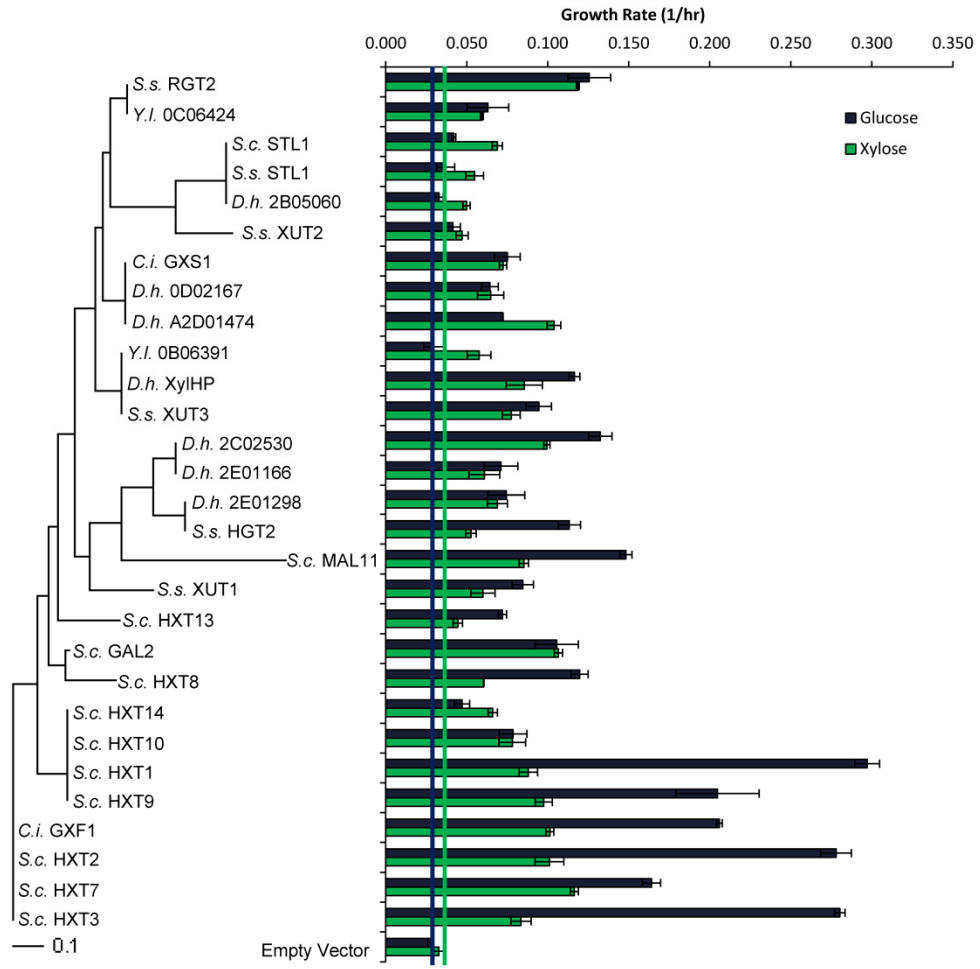

Figure S6

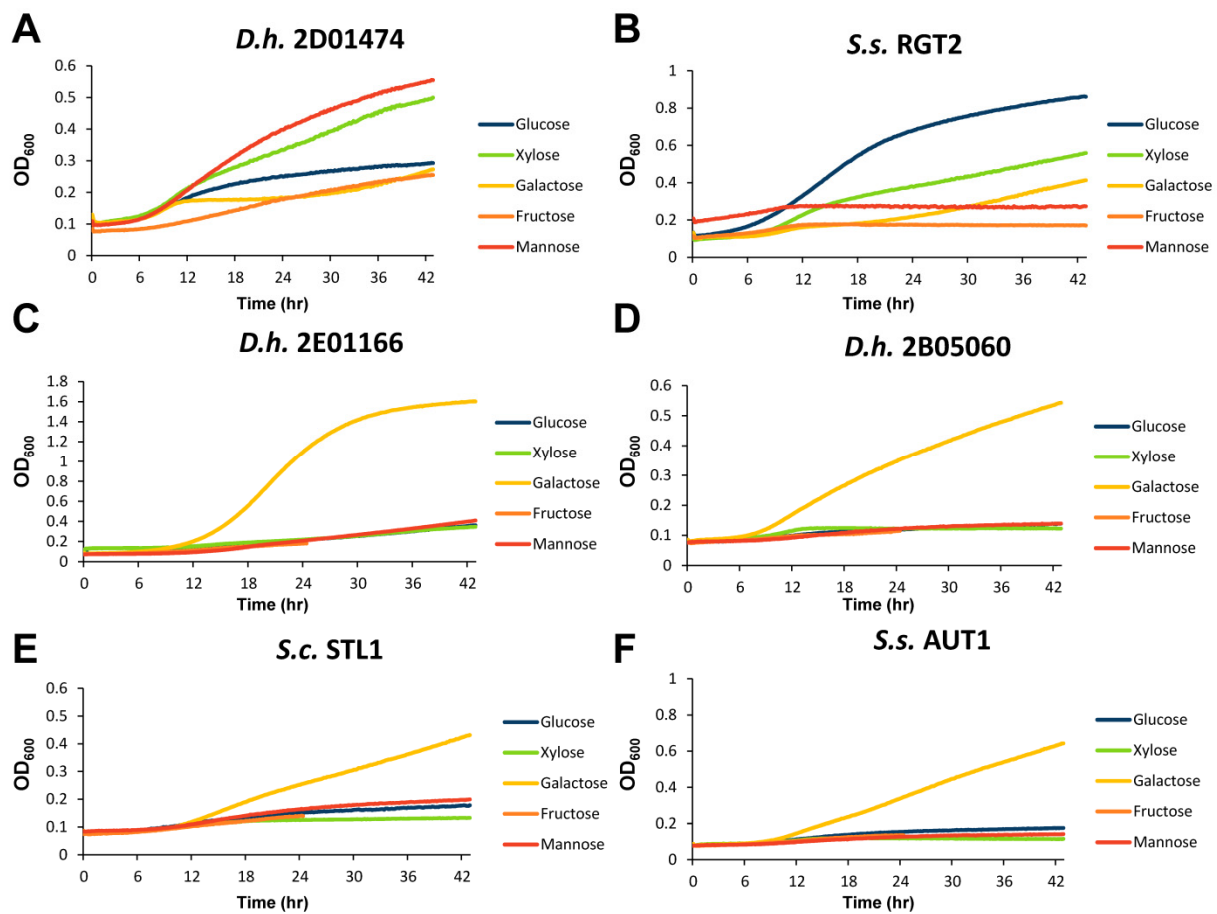

Figure S7

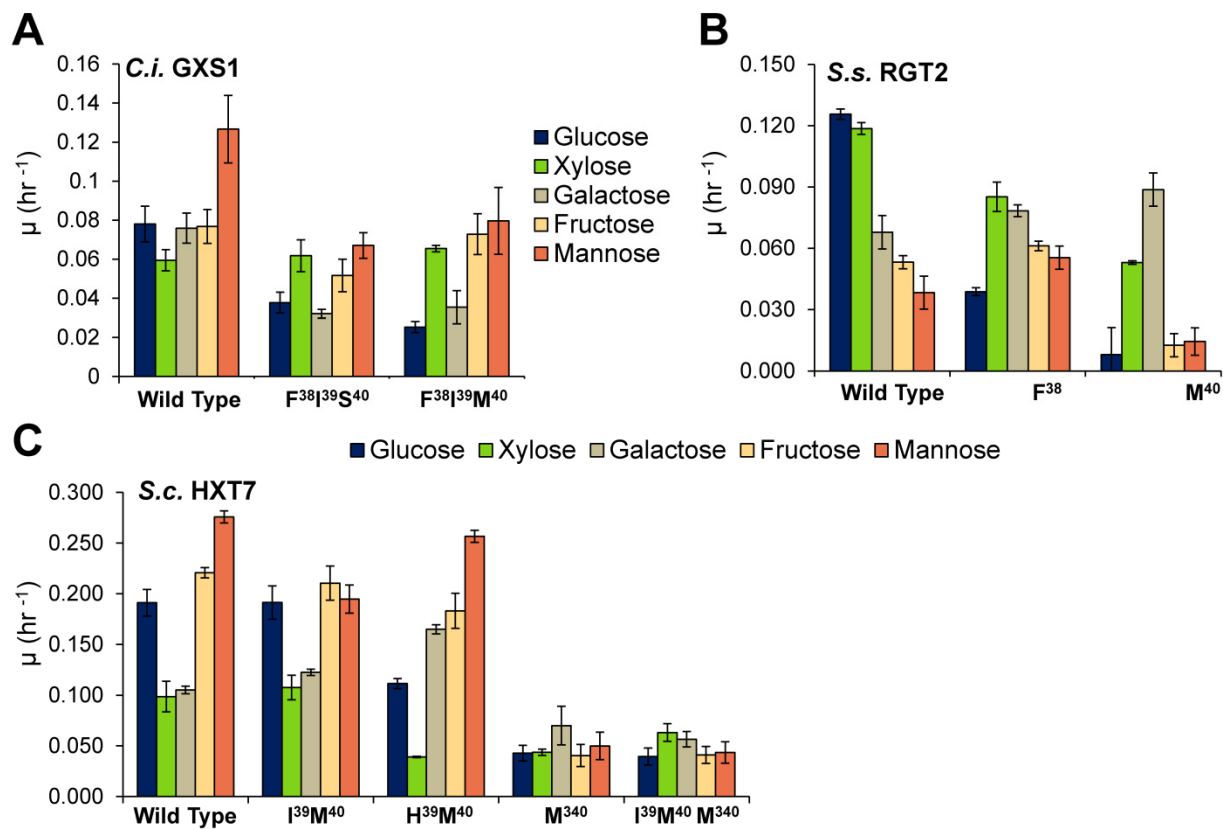

**Table S1***Exponential growth rate values for each cloned transporter.*

|            | GeneID   | GenBank    | Glucose         |            | Xylose          |            | Galactose       |            | Fructose        |            | Mannose         |            |
|------------|----------|------------|-----------------|------------|-----------------|------------|-----------------|------------|-----------------|------------|-----------------|------------|
|            |          |            | $\mu$<br>(1/hr) | st.<br>dev |
| Empty      | -        | -          | 0.028           | 0.002      | 0.033           | 0.004      | 0.054           | 0.004      | 0.041           | 0.008      | 0.038           | 0.002      |
| At5g59250  | 836043   |            | 0.031           | 0.004      | 0.045           | 0.003      | 0.057           | 0.007      | 0.046           | 0.008      | 0.037           | 0.001      |
| At5g17010  | 831564   |            | 0.024           | 0.002      | 0.032           | 0.002      | 0.046           | 0.004      | 0.032           | 0.002      | 0.036           | 0.005      |
| Ci GFX1    |          | AJ937350.1 | 0.206           | 0.002      | 0.101           | 0.003      | 0.072           | 0.000      | 0.278           | 0.003      | 0.268           | 0.004      |
| Ci GXS1    |          | AJ875406.1 | 0.065           | 0.008      | 0.062           | 0.002      | 0.074           | 0.004      | 0.082           | 0.003      | 0.098           | 0.000      |
| Dh 0D02167 | 2901237  |            | 0.064           | 0.005      | 0.065           | 0.008      | 0.111           | 0.007      | 0.093           | 0.007      | 0.123           | 0.010      |
| Dh 2B14278 | 2913528  |            | 0.055           | 0.005      | 0.026           | 0.011      | 0.094           | 0.009      | 0.081           | 0.017      | 0.114           | 0.009      |
| Dh 2A14300 | 8998057  |            | 0.036           | 0.004      | 0.040           | 0.013      | 0.051           | 0.004      | 0.035           | 0.007      | 0.032           | 0.001      |
| Dh 2F19140 | 8999011  |            | 0.026           | 0.002      | 0.036           | 0.005      | 0.046           | 0.002      | 0.034           | 0.009      | 0.035           | 0.004      |
| Dh XylHP   | 50419288 |            | 0.116           | 0.003      | 0.098           | 0.010      | 0.100           | 0.014      | 0.123           | 0.006      | 0.126           | 0.004      |
| Ec XylE    | 948529   |            | 0.026           | 0.002      | 0.039           | 0.006      | 0.050           | 0.006      | 0.024           | 0.002      | 0.030           | 0.009      |
| Ss XUT1    | 4839826  |            | 0.085           | 0.007      | 0.060           | 0.007      | 0.109           | 0.008      | 0.060           | 0.003      | 0.096           | 0.003      |
| Ss XUT2    | 4852047  |            | 0.042           | 0.005      | 0.047           | 0.004      | 0.067           | 0.005      | 0.041           | 0.002      | 0.035           | 0.011      |
| Ss XUT3    | 4851844  |            | 0.064           | 0.008      | 0.078           | 0.005      | 0.099           | 0.007      | 0.090           | 0.010      | 0.109           | 0.009      |
| Ss XUT4    | 4840896  |            | 0.027           | 0.005      | 0.024           | 0.001      | 0.050           | 0.009      | 0.029           | 0.003      | 0.043           | 0.006      |
| Ss XUT5    | 4840252  |            | 0.029           | 0.001      | 0.029           | 0.008      | 0.020           | 0.003      | 0.031           | 0.002      | 0.027           | 0.002      |
| Ss XUT6    | 4841106  |            | 0.044           | 0.004      | 0.021           | 0.003      | 0.053           | 0.007      | 0.032           | 0.003      | 0.029           | 0.002      |
| Ss XUT7    | 4851701  |            | 0.028           | 0.008      | 0.032           | 0.005      | 0.048           | 0.001      | 0.030           | 0.006      | 0.033           | 0.007      |
| Yi 0B06391 | 2907283  |            | 0.030           | 0.006      | 0.063           | 0.002      | 0.054           | 0.006      | 0.051           | 0.007      | 0.058           | 0.009      |
| Yi 0B01342 | 2906708  |            | 0.031           | 0.003      | 0.036           | 0.003      | 0.062           | 0.001      | 0.038           | 0.010      | 0.035           | 0.005      |
| Yi F06776  | 2908504  |            | 0.032           | 0.005      | 0.039           | 0.004      | 0.049           | 0.003      | 0.033           | 0.008      | 0.039           | 0.008      |
| Yi 0C06424 | 2909312  |            | 0.063           | 0.013      | 0.059           | 0.001      | 0.075           | 0.010      | 0.048           | 0.005      | 0.069           | 0.010      |
| Yi 0C08943 | 2909701  |            | 0.031           | 0.005      | 0.039           | 0.003      | 0.046           | 0.004      | 0.029           | 0.007      | 0.027           | 0.003      |
| Cn BC3990  | 4935064  |            | 0.031           | 0.008      | 0.034           | 0.010      | 0.045           | 0.001      | 0.032           | 0.005      | 0.030           | 0.004      |
| Sc HXT7    | 851943   |            | 0.191           | 0.013      | 0.099           | 0.015      | 0.130           | 0.008      | 0.254           | 0.008      | 0.278           | 0.005      |
| Sc HXT13   | 856640   |            | 0.072           | 0.003      | 0.045           | 0.003      | 0.055           | 0.011      | 0.059           | 0.003      | 0.132           | 0.008      |
| Sc GAL2    | 856640   |            | 0.105           | 0.013      | 0.107           | 0.003      | 0.078           | 0.009      | 0.164           | 0.003      | 0.237           | 0.008      |
| Sc HXT3    | 851946   |            | 0.280           | 0.003      | 0.083           | 0.006      | 0.053           | 0.002      | 0.314           | 0.006      | 0.258           | 0.007      |
| Sc HXT1    | 856494   |            | 0.297           | 0.008      | 0.088           | 0.006      | 0.118           | 0.003      | 0.303           | 0.003      | 0.229           | 0.004      |
| Dh 2C02530 | 8998297  |            | 0.132           | 0.007      | 0.099           | 0.002      | 0.055           | 0.006      | 0.075           | 0.002      | 0.138           | 0.005      |
| Dh 2E01166 | 2902950  |            | 0.071           | 0.010      | 0.061           | 0.010      | 0.174           | 0.002      | 0.054           | 0.007      | 0.081           | 0.002      |
| Dh 2E01298 | 2902912  |            | 0.074           | 0.011      | 0.069           | 0.006      | 0.056           | 0.005      | 0.041           | 0.002      | 0.040           | 0.002      |
| Sc MAL11   | 853207   |            | 0.148           | 0.004      | 0.085           | 0.003      | 0.117           | 0.001      | 0.038           | 0.006      | 0.034           | 0.002      |
| Sc STL1    | 852149   |            | 0.034           | 0.001      | 0.069           | 0.003      | 0.089           | 0.004      | 0.034           | 0.006      | 0.029           | 0.004      |
| Sc HXT2    | 855023   |            | 0.278           | 0.009      | 0.101           | 0.009      | 0.079           | 0.009      | 0.287           | 0.002      | 0.256           | 0.002      |
| Sc HXT8    | 853216   |            | 0.120           | 0.005      | 0.060           | 0.000      | 0.064           | 0.001      | 0.111           | 0.003      | 0.172           | 0.007      |
| Sc HXT9    | 853236   |            | 0.205           | 0.026      | 0.098           | 0.005      | 0.065           | 0.005      | 0.249           | 0.022      | 0.207           | 0.011      |
| Sc HXT10   | 850536   |            | 0.079           | 0.009      | 0.078           | 0.008      | 0.124           | 0.008      | 0.125           | 0.003      | 0.137           | 0.009      |
| Sc HXT14   | 855398   |            | 0.042           | 0.009      | 0.032           | 0.006      | 0.061           | 0.005      | 0.051           | 0.003      | 0.051           | 0.012      |
| Ss AUT1    | 4836720  |            | 0.046           | 0.005      | 0.038           | 0.004      | 0.104           | 0.009      | 0.036           | 0.004      | 0.046           | 0.019      |
| Ss HGT2    | 4836632  |            | 0.113           | 0.007      | 0.024           | 0.010      | 0.120           | 0.007      | 0.100           | 0.002      | 0.179           | 0.002      |
| Ss RGT2    | 4840859  |            | 0.126           | 0.013      | 0.119           | 0.001      | 0.068           | 0.008      | 0.038           | 0.007      | 0.053           | 0.006      |
| Dh 2B05060 | 2913215  |            | 0.033           | 0.003      | 0.050           | 0.002      | 0.112           | 0.001      | 0.028           | 0.001      | 0.029           | 0.001      |
| Dh 2E01386 | 2902914  |            | 0.032           | 0.004      | 0.035           | 0.001      | 0.069           | 0.002      | 0.137           | 0.030      | 0.045           | 0.015      |
| Yi 0D00132 | 2910370  |            | 0.026           | 0.006      | 0.034           | 0.002      | 0.039           | 0.005      | 0.035           | 0.007      | 0.035           | 0.005      |
| Ss STL1    | 4838168  |            | 0.037           | 0.006      | 0.055           | 0.006      | 0.060           | 0.005      | 0.061           | 0.004      | 0.045           | 0.008      |
| Dh 2D01474 | 2901237  |            | 0.072           | 0.000      | 0.104           | 0.004      | 0.082           | 0.006      | 0.085           | 0.006      | 0.061           | 0.004      |

**Table S2**

*Kinetics values calculated from radiolabeled xylose uptake.*

| Gene in p414-TEF                                                 | $K_M$<br>(mM)   | $V_{MAX}$<br>(nmol min <sup>-1</sup> gDCW <sup>-1</sup> ) |
|------------------------------------------------------------------|-----------------|-----------------------------------------------------------|
| <b><i>C.i. GXS1</i></b>                                          | 0.0256 ± 0.0659 | 7.23 ± 0.6                                                |
| <i>C.i. GXS1</i> F <sup>38</sup> I <sup>39</sup> M <sup>40</sup> | 0.721 ± 0.116   | 15.01 ± 2.38                                              |

**Table S3***Form of the G-G/F-XXXG motif for all cloned transporters.*

|            | GG? | X1 | X2 | X3 |
|------------|-----|----|----|----|
| At5g59250  | Yes | L  | L  | F  |
| At5g17010  | Yes | L  | L  | Y  |
| Ci GXF1    | Yes | F  | V  | F  |
| Ci GXS1    | Yes | V  | L  | F  |
| Dh 0D02167 | Yes | V  | L  | F  |
| Dh 2B14278 | Yes | F  | L  | Y  |
| Dh 2A14300 | SG  | M  | M  | F  |
| Dh 2F19140 | No  | -  | -  | -  |
| Dh XylHP   | Yes | L  | L  | F  |
| Ec XylE    | Yes | L  | I  | F  |
| Ss XUT1    | Yes | L  | V  | Y  |
| Ss XUT2    | AF  | I  | L  | F  |
| Ss XUT3    | Yes | L  | L  | F  |
| Ss XUT4    | No  | -  | -  | -  |
| Ss XUT5    | HP  | T  | I  | M  |
| Ss XUT6    | GF  | L  | L  | F  |
| Ss XUT7    | No  | -  | -  | -  |
| YI 0B06391 | Yes | L  | L  | F  |
| YI 0B01342 | Yes | M  | L  | F  |
| YI F06776  | GV  | F  | L  | F  |
| YI 0C06424 | Yes | I  | L  | F  |
| YI 0C08943 | Yes | L  | L  | Y  |
| Cn BC3990  | GV  | W  | L  | F  |
| Sc HXT7    | Yes | F  | V  | F  |
| Sc HXT13   | Yes | F  | L  | P  |
| Sc GAL2    | Yes | F  | M  | F  |
| Sc HXT3    | Yes | F  | V  | F  |
| Sc HXT1    | Yes | F  | I  | F  |
| Dh 2C02530 | SG  | L  | M  | F  |
| Dh 2E01166 | SG  | L  | M  | F  |
| Dh 2E01298 | SG  | M  | M  | F  |
| Sc MAL11   | TL  | V  | M  | E  |
| Sc STL1    | GF  | S  | L  | F  |
| Sc HXT2    | Yes | F  | V  | F  |
| Sc HXT8    | Yes | F  | M  | S  |
| Sc HXT9    | Yes | F  | I  | F  |
| Sc HXT10   | Yes | F  | I  | F  |
| Sc HXT14   | Yes | F  | I  | F  |
| Ss AUT1    | No  | -  | -  | -  |



|            |     |   |   |   |
|------------|-----|---|---|---|
| Ss HGT2    | SG  | M | M | F |
| Ss RGT2    | Yes | I | L | F |
| Dh 2B05060 | GF  | S | L | F |
| Dh 2E01386 | GF  | S | L | F |
| YI 0D00132 | N   | - | - | - |
| Ss STL1    | GF  | S | L | F |
| Dh 2D01474 | Y   | V | L | F |

**Table S4***Primers used for cloning putative transporters.*

| Name  | Target ORF | Orientation | Tm | R. Enz. | Sequence                                  |
|-------|------------|-------------|----|---------|-------------------------------------------|
| EY194 | ScHXT3     | F           | 55 | XmaI    | TATCCCCCGGGatgaattcaactccagatttaatatctcc  |
| EY208 | ScHXT3     | R           | 64 | Clal    | CGGTATCCATCGATttatttcttgccgaacatttctt     |
| EY265 | HXT1       | F           | 64 | XmaI    | TATCCCCCGGGatgaattcaactcccgatctaatac      |
| EY266 | HXT1       | R           | 64 | Clal    | CGGTATCCATCGATttatttcttgctaaacaaactcttg   |
| EY554 | SsHGT2     | F           | 60 | SpeI    | GGACTAGTatgagctacgaagataaactcg            |
| EY555 | SsHGT2     | R           | 60 | Sall    | TATCCGTCGACttaaaggcttttctcagaact          |
| EY558 | Dh2C02530  | F           | 60 | SpeI    | GGACTAGTatgggttacgaagataaattagtg          |
| EY559 | Dh2C02530  | R           | 60 | Sall    | TATCCGTCGACttaaagtcattgagaagatcgc         |
| EY560 | Dh2E01166  | F           | 61 | SpeI    | GGACTAGTatgggatagaagaaaagtgg              |
| EY561 | Dh2E01166  | R           | 59 | Sall    | TATCCGTCGACtcaagcaatgtgatctgc             |
| EY562 | Dh2E01298  | F           | 61 | SpeI    | GGACTAGTatgggatacgaagataaattactagg        |
| EY563 | Dh2E01298  | R           | 60 | Sall    | TATCCGTCGACtcaagcaatattggacagcactag       |
| EY564 | ScMAL11    | F           | 60 | SpeI    | GGACTAGTatgaaaaatatcatttcattggtaag        |
| EY565 | ScMAL11    | R           | 60 | Sall    | TATCCGTCGACttaaactttatcagctgcatttaat      |
| EY566 | ScSTL1     | F           | 60 | SpeI    | GGACTAGTatgaaggatttaaattatcgaattt         |
| EY567 | ScSTL1     | R           | 60 | Sall    | TATCCGTCGACtcaacctcaaaatttgct             |
| EY568 | SsRGT2     | F           | 60 | SpeI    | GGACTAGTatgggtttagaagacagtgc              |
| EY569 | SsRGT2     | R           | 61 | Sall    | TATCCGTCGACctatacagaagcttctcaactcag       |
| EY572 | SsAUT1     | F           | 61 | XmaI    | TATCCCCCGGGatgagtgctgacgaaaaagtc          |
| EY573 | SsAUT1     | R           | 61 | XhoI    | TATCCCTCGAGctactcgacataagagactctgg        |
| EY574 | HXT8       | F           | 61 | XmaI    | TATCCCCCGGGatgactgatcgtaaaaccaactt        |
| EY575 | HXT8       | R           | 61 | XhoI    | TATCCCTCGAGctaaaacattctttgtagaagggtt      |
| EY576 | HXT2       | F           | 62 | XmaI    | TATCCCCCGGGatgtctgaattcgtactagcc          |
| EY577 | HXT2       | R           | 63 | XhoI    | TATCCCTCGAGttattcctcggaaactcttttc         |
| EY578 | HXT9       | F           | 62 | XmaI    | TATCCCCCGGGatgtccggtgtaataatacatcc        |
| EY579 | HXT9       | R           | 62 | XhoI    | TATCCCTCGAGttagctggaaaagaacctctg          |
| EY580 | HXT10      | F           | 60 | XmaI    | TATCCCCCGGGatggtagttcaaggtttcca           |
| EY581 | HXT10      | R           | 60 | XhoI    | TATCCCTCGAGttattactatcaacaataactaattggtac |
| EY582 | HXT14      | F           | 61 | XmaI    | TATCCCCCGGGatgactgctcagattccgtat          |
| EY583 | HXT14      | R           | 61 | XhoI    | TATCCCTCGAGctactccggttcaaatattttattg      |
| EY644 | SsSTL1     | F           | 61 | SpeI    | GGACTAGTatggcatacttgattggtaac             |
| EY645 | SsSTL1     | R           | 62 | XmaI    | TATCCCCCGGGctaggctgcttttaggttttctg        |
| EY646 | DhE01386   | F           | 61 | SpeI    | GGACTAGTatgtataaataatggtcaaaaactaacact    |
| EY647 | DhE01386   | R           | 61 | XmaI    | TATCCCCCGGGttaaactccgcaggcttaa            |
| EY648 | DhB05060   | F           | 63 | SpeI    | GGACTAGTatggctttaaatacttttctagaacc        |
| EY649 | DhB05060   | R           | 63 | XmaI    | TATCCCCCGGGttaaagcattaggagtaagatacctctg   |
| EY650 | YI0D00132  | F           | 63 | SpeI    | GGACTAGTatggttttggacgagaaaaag             |
| EY651 | YI0D00132  | R           | 63 | XmaI    | TATCCCCCGGGttaaacgaactcggcagtg            |
| EY700 | DhA2D01474 | F           | 55 | XmaI    | TATCCCCCGGGatgggtttagaagataatgc           |
| EY701 | DhA2D01474 | R           | 56 | XhoI    | TATCCCTCGAGttagactgaaggtgttcaat           |

**Table S5***Primers used for saturation mutagenesis of C. intermedia GX51.*

| <i>Name</i> | <i>Target A.A.</i> | <i>Orientation</i> | <i>Tm</i> | <i>Kit Used</i> | <i>Sequence</i>                                |
|-------------|--------------------|--------------------|-----------|-----------------|------------------------------------------------|
| EY630       | GXS1Sat40          | F                  | 79        | Sat Multi       | tttgctgcttctgggtggtgccttNNKggatacgaactggacta   |
| EY675       | GXS1 39LSat        | F                  | 79        | Sat Multi       | tttgctgcttctgggtggtcnnkttcggatacgaactggact     |
| EY676       | GXS1 38VSat        | R                  | 79        | Sat Multi       | gtcttttgctgcttctgggtggnnkctttcggatacgaactggact |
| EY711       | GXS1 38Sat         | F                  | 79        | Sat Multi       | gtcttttgctgcttctgggtggyrktttcggatacgaactggact  |
| EY712       | GXS1 39LSat        | F                  | 79        | Sat Multi       | tttgctgcttctgggtggtcvtcggatacgaactggact        |
| EY723       | GXS139DDK          | F                  | 78        | Sat Multi       | tttgctgcttctgggtggtcDDKttcggatacgaactggact     |
| EY727       | GXS1 38Y           | F                  | 78        | Quik            | gctgcttctgggtgtatctttcggatacgaact              |
| EY728       | GXS1 38Y           | R                  | 78        | Quik            | gtatcgtatccgaaaagataaccaccagaagcagc            |
| EY729       | GXS1 38C           | F                  | 78        | Quik            | gctgcttctgggtgtatctttcggatacgaact              |
| EY730       | GXS1 38C           | R                  | 78        | Quik            | gtatcgtatccgaaaagacaaccaccagaagcagc            |
| EY731       | GXS1 38H           | F                  | 78        | Quik            | gctgcttctgggtgtatctttcggatacgaact              |
| EY732       | GXS1 38H           | R                  | 78        | Quik            | gtatcgtatccgaaaagacaaccaccagaagcagc            |
| EY733       | GXS1 39H           | F                  | 78        | Quik            | tgcttctgggtgtccatttcggatacgaactg               |
| EY734       | GXS1 39H           | R                  | 78        | Quik            | cagtatcgtatccgaaatggacaccaccagaagca            |
| EY735       | GXS1 39M           | F                  | 78        | Quik            | gctgcttctgggtgtatctttcggatacgaactgg            |
| EY736       | GXS1 39M           | R                  | 78        | Quik            | accagtatcgtatccgaacatgacaccaccagaagcagc        |

**Table S6***Primers used for point mutations.*

| Name  | Target A.A. | Orientation | Tm | Sequence                                                         |
|-------|-------------|-------------|----|------------------------------------------------------------------|
| EY702 | SsRGT2-F40M | F           | 78 | cagccttcggtggatccttatgggtatgacactggt                             |
| EY703 | SsRGT2-F40M | R           | 78 | accagtgtcataaccataaggataaccaccgaaggctg                           |
| EY737 | GXS1 FLS    | F           | 78 | ttttgctgcttctgggtgttcctttctggatacg                               |
| EY738 | GXS1 FLS    | R           | 78 | cgatccagaaaggaaaccaccagaagcagcaaaaa                              |
| EY739 | GXS1 FIS    | F           | 78 | tttgctgcttctgggtgttcatttctggatacgatactgg                         |
| EY740 | GXS1 FIS    | R           | 78 | ccagtatcgatccagaaatgaaccaccagaagcagcaaaa                         |
| EY741 | GXS1 FIM    | F           | 78 | tttgctgcttctgggtgttcattatgggatacgatactgg                         |
| EY742 | GXS1 FIM    | R           | 78 | ccagtatcgatccataatgaaccaccagaagcagcaaaa                          |
| EY747 | SchXT7M340  | F           | 78 | ctatgattcaatctctacaacaattgacaggtatgaactatttcttactatggtactactat   |
| EY748 | SchXT7M340  | R           | 78 | aaaatagtagtaccatagtagaagaatagttcatacctgtcaattgttagagattgaatcatag |
| EY749 | SchXT7 FHM  | F           | 78 | catgatcgccittgggtgttcacatgggtgggatactggtaccatt                   |
| EY750 | SchXT7 FHM  | R           | 78 | aaatgggtaccagatcccaaccataggaaccaccaaaaggcgatcatg                 |
| EY753 | SchXT10 63M | F           | 78 | ctgatgattgccittgggtgttcattatgggtgggatacagg                       |
| EY754 | SchXT10 63M | R           | 78 | cctgtatcccaaccataatgaatccaccaaaaggcaatcatcag                     |
| EY760 | SsRGT2-38F  | F           | 78 | gttcgcagccttcggtggttccttttcggta                                  |
| EY761 | SsRGT2-38F  | R           | 78 | taaccgaaaaggaaaccaccgaaggctgcgaac                                |
| EY766 | SchXT7-FIM  | F           | 78 | catgatcgccittgggtgttcattatgggtgggatactggtaccatt                  |
| EY767 | SchXT7-FIM  | R           | 78 | aaatgggtaccagatcccaaccataatgaaccaccaaaaggcgatcatg                |
